# Supplementary material for: A Two-Stage Path Planning Method for the Rearrangement Problem in Modular Puzzle-Based Storage System
Source: Hindawi journal article supplement (doi:10.1155/2021/6626569), 2021-04-23
Supplement: f1 [file 6626569.f1.docx]

It seems that the submission system does not support uploading files in MP4 format, so we inserted video files into this document in docx format.

The two instances are based on the parameters in Section 5.3. In this two instances, the number of orders are all set as 8, and the storage density are set as 50% and 90%, respectively. Here we choose the simulations on storage densities so that the comparison of the optimization effect between the block move and the parallel move can be observed more intuitively.

Video 1 and Video 2 are the inserted video files with storage destiny of 50% and 90%, respectively. Table 1 gives the numerical results.

|  |  |
| --- | --- |
| Video 1: The video with a storage destiny of 50% | Video 2: The video with a storage destiny of 90%. |

Table 1: Experimental results with storage destinies of 50% and 90%.

| Parameter configurations | | Results of case *Single* | Results of case *Block* | Results of case *Para* | Results of case *Both* |
| --- | --- | --- | --- | --- | --- |
|  |  |  |  |  |  |
| 50% | 8 | 176 | 101 | 96 | 75 |
| 90% | 8 | 904 | 298 | 681 | 249 |
